# Supplementary material
Source: Royal Society of Chemistry journal article supplement (doi:10.1039/d6ta02127a)
Supplement: d6ta02127a1.pdf [file d6ta02127a1.pdf]

## Supporting Information

# Synergistic Ti/F Co-doping for Enhanced Electrochemical Performance of $\text{LiNi}_{0.5}\text{Mn}_{1.5}\text{O}_4$ Cathodes via $\text{Ti}^{3+}/\text{Ti}^{4+}$ Redox and Structural Stabilization

Shengrui Cui <sup>a,1</sup>, Chengliang Lin <sup>a,1</sup>, Fangfang Dong <sup>a</sup>, Mingxu Duan <sup>a</sup>, Mengqiu Li <sup>a</sup>,  
Abdul Majid <sup>b,\*</sup>, Ayaulym Belgibayeva <sup>c,\*</sup>, Yongcheng Jin <sup>a,\*</sup>

## 1. Results and Discussion

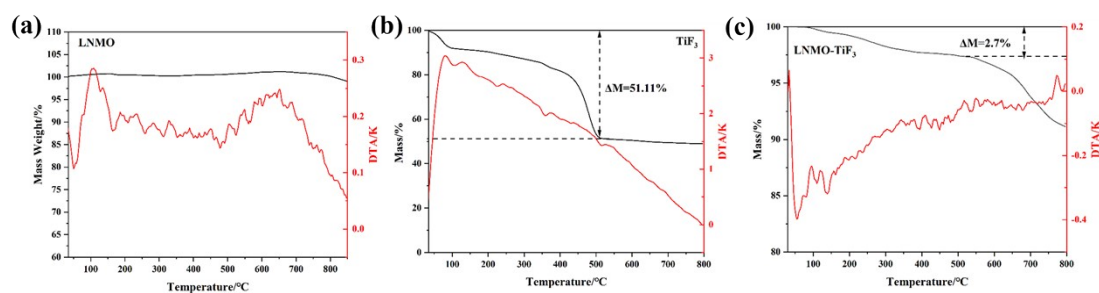

Figure S1 TG and DTA curves of (a) LNMO, (b)  $\text{TiF}_3$ , (c)  $\text{LNMO-TiF}_3$

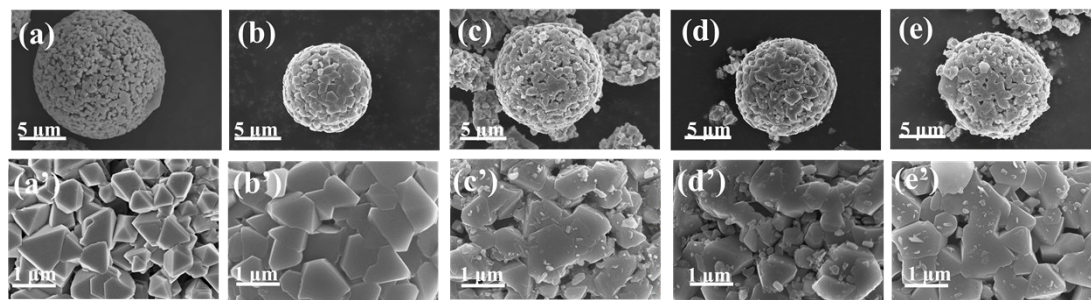

Figure S2 SEM images of all samples. (a)(a')LNMO, (b)(b')LNMO-550 °C, (c)(c') LNMO-TiF<sub>3</sub>-2, (d)(d') LNMO-TiF<sub>3</sub>-4, (e)(e') LNMO-TiF<sub>3</sub>-6

The preparation process of LNMO and LNMO-550°C samples is consistent with our previous work,<sup>[19]</sup> so we directly used the SEM image. *Copyright © 2023, American Chemical Society.*

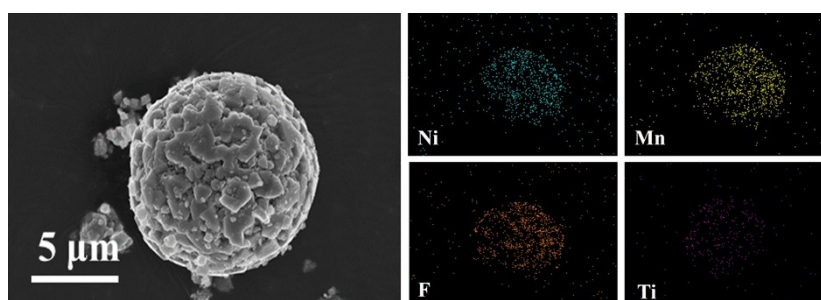

Figure S3 The SEM images and of EDX mapping of LNMO-TiF<sub>3</sub>-4

Table S1. ICP-MS results for the all as-prepared samples

| Samples                  | Molar ratio |      |      |      |
|--------------------------|-------------|------|------|------|
|                          | Li          | Ni   | Mn   | Ti   |
| LNMO                     | 1.08        | 0.50 | 1.51 | /    |
| LNMO-550 °C              | 1.07        | 0.51 | 1.52 | /    |
| LNMO-TiF <sub>3</sub> -2 | 1.06        | 0.49 | 1.49 | 0.02 |
| LNMO-TiF <sub>3</sub> -4 | 1.03        | 0.48 | 1.48 | 0.04 |
| LNMO-TiF <sub>3</sub> -6 | 1.06        | 0.48 | 1.46 | 0.06 |

Table S2 Table of refinement parameters for all samples

| Samples                  | Phase        | Parameter (Å) | Cell Volume (Å <sup>3</sup> ) | Occupancy |        | R <sub>wp</sub> (%) | χ <sup>2</sup> (%) |
|--------------------------|--------------|---------------|-------------------------------|-----------|--------|---------------------|--------------------|
|                          |              |               |                               | TM        | Ti     |                     |                    |
| LNMO                     | <i>Fd-3m</i> | 8.1657(15)    | 544.530(17)                   | 1.0000    | 0.0000 | 3.71                | 6.54               |
| LNMO-550 °C              | <i>Fd-3m</i> | 8.1675(12)    | 544.838(34)                   | 1.0000    | 0.0000 | 1.82                | 2.08               |
| LNMO-TiF <sub>3</sub> -2 | <i>Fd-3m</i> | 8.1702(06)    | 545.378(32)                   | 0.9914    | 0.0086 | 3.04                | 4.54               |
| LNMO-TiF <sub>3</sub> -4 | <i>Fd-3m</i> | 8.1736(88)    | 546.059(18)                   | 0.9780    | 0.0220 | 2.82                | 4.22               |
| LNMO-TiF <sub>3</sub> -6 | <i>Fd-3m</i> | 8.1782(14)    | 546.567(18)                   | 0.9688    | 0.0312 | 3.01                | 3.21               |

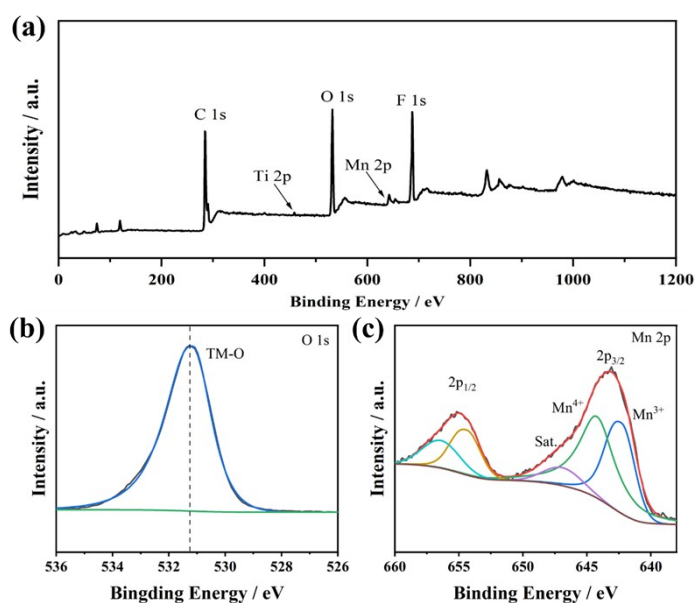

Figure S4 The XPS patterns of the LNMO-TiF<sub>3</sub>-4 samples (a) survey spectrum (b) Mn 2p and (c)

O 1s

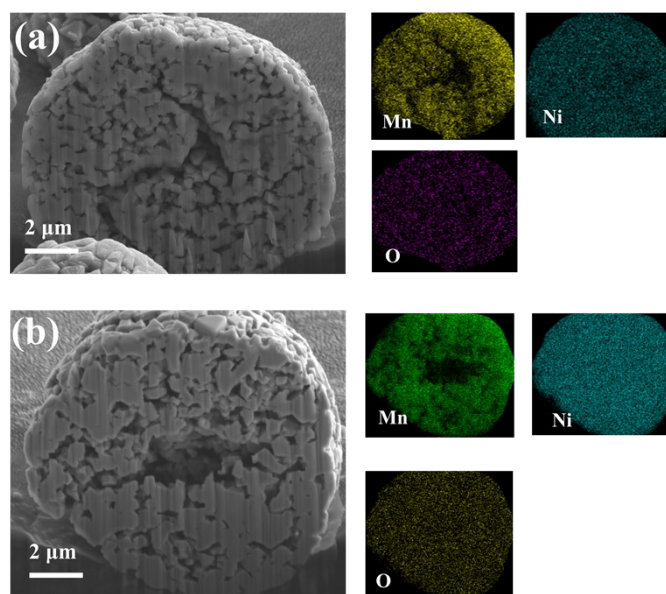

Figure S5 FIB-SEM images and of EDX mapping of (a) LNMO, (b) LNMO-550°C

The preparation process of LNMO and LNMO-550°C samples is consistent with our previous work,<sup>[19]</sup> so we directly used the FIB-SEM image. *Copyright © 2023, American Chemical Society.*

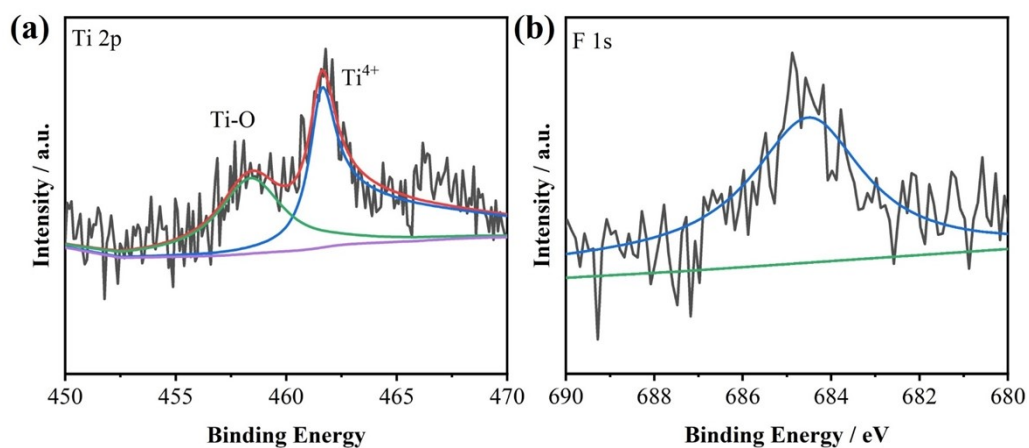

Figure S6 The XPS patterns of the LNMO-TiF<sub>3-4</sub> samples 100 nm of Ar<sup>+</sup> etching (a) Ti 2p, (b)F

1s.

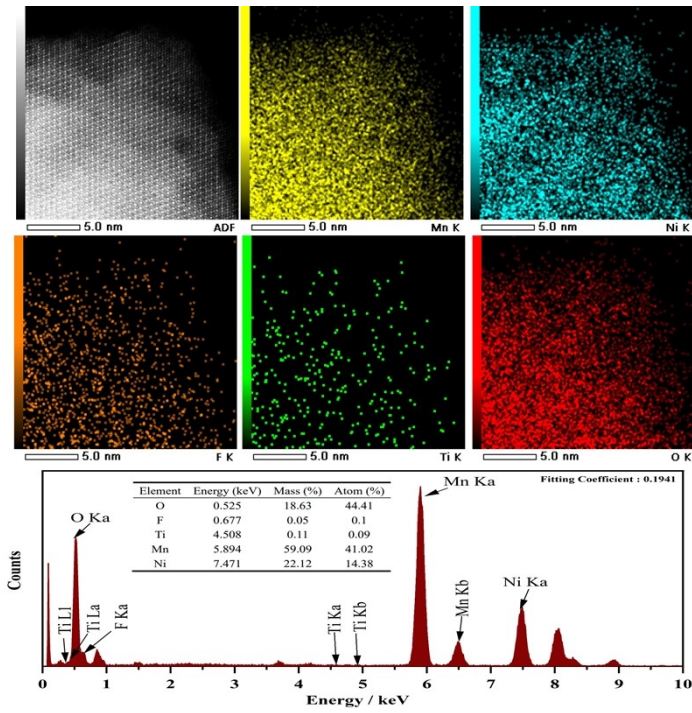

Figure S7 The STEM with EDS of LNMO-TiF<sub>3</sub>-4.

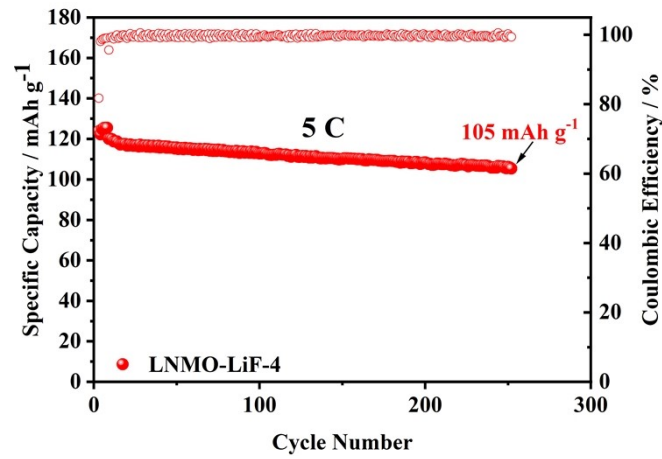

Figure S8 5 C cycling performance of LNMO-LiF-4.

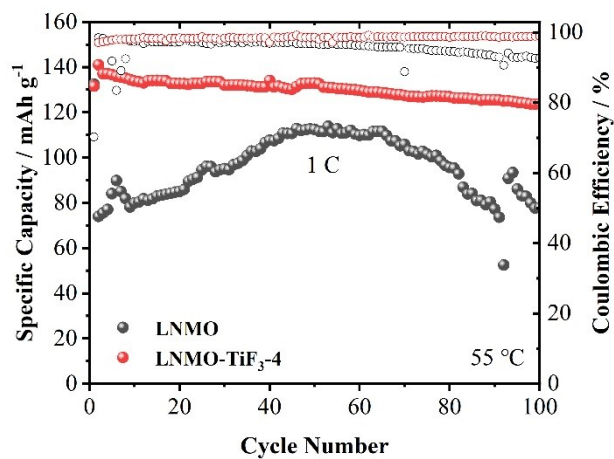

Figure S9 1 C cycling performance at 55 °C.

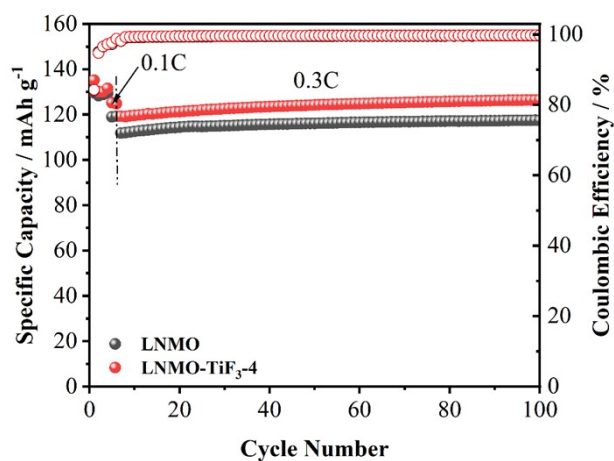

Figure S10 The cycle performance of LNMO//graphite and LNMO-TiF<sub>3</sub>-4// graphite full cells at 0.3C rate.

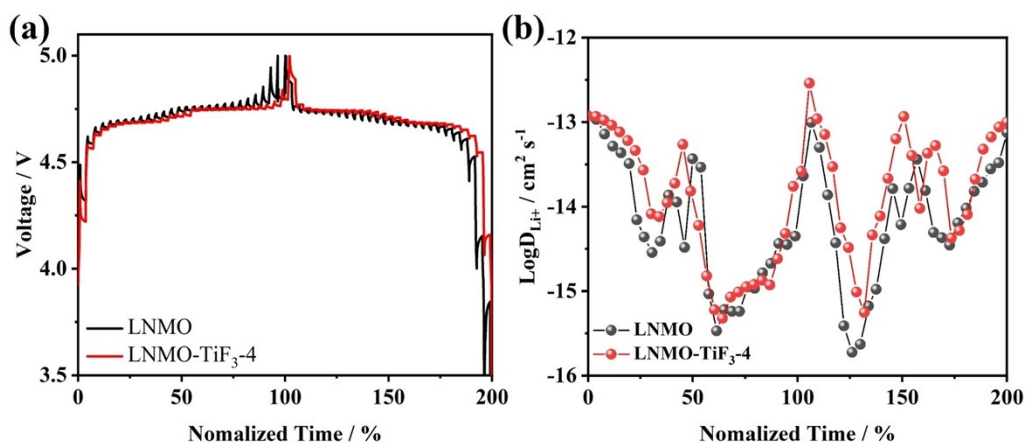

Figure S11 (a) The GITT curves of LNMO and LNMO-TiF<sub>3</sub>-4, (b) Li<sup>+</sup> diffusion coefficients calculated from the GITT profiles during the charge-discharge process.

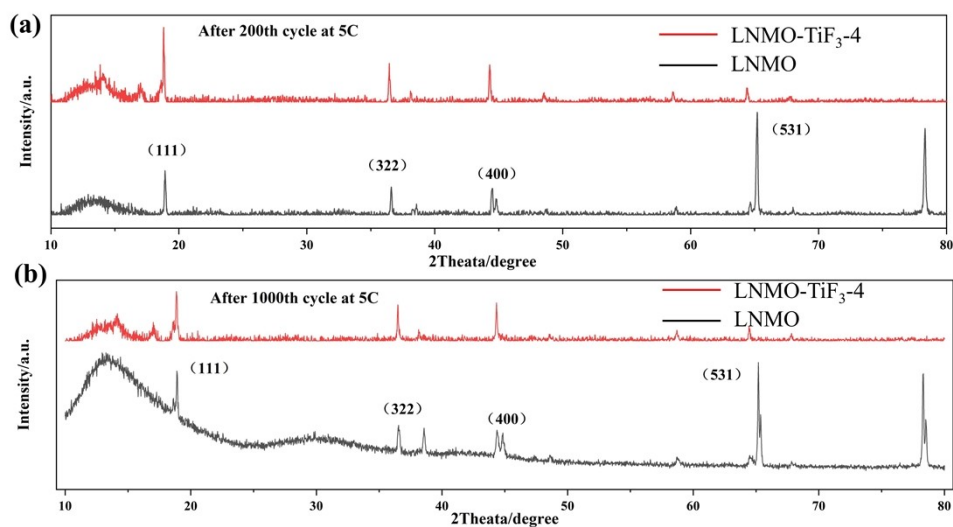

Figure S12 XRD patterns of LNMO and LNMO-TiF<sub>3</sub>-4 samples. (a) XRD pattern after 200 cycles at 5 C, (b) XRD pattern after 1000 cycles.

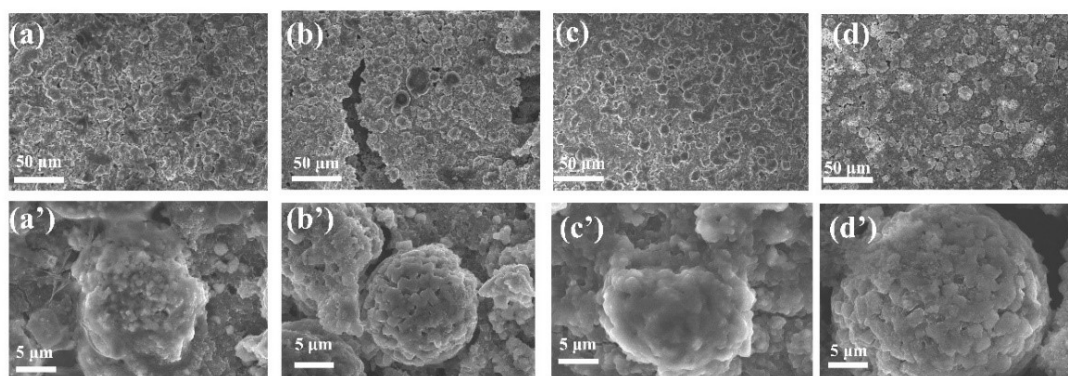

Figure S13 SEM images of (a)(a') LNMO, (b) (b') LNMO-TiF<sub>3</sub>-4 after 200 cycles at 5 C, (c)(c') LNMO and (d)(d') LNMO-TiF<sub>3</sub>-4 after 1000 cycles at 5 C, respectively.

Table S3. ICP-MS results for lithium after cycling

| Sample                   | Element | Elemental concentration in digestion solution/original sample solution | Elemental content W (%) |
|--------------------------|---------|------------------------------------------------------------------------|-------------------------|
|                          |         | $C_1$ ( $\mu\text{g/L}$ )                                              |                         |
| LNMO                     | Mn      | 2320.850                                                               | 0.368                   |
|                          | Ni      | 715.900                                                                | 0.114                   |
| LNMO-TiF <sub>3</sub> -4 | Mn      | 427.950                                                                | 0.078                   |
|                          | Ni      | 165.600                                                                | 0.030                   |

The calculation process for the additional theoretical capacity increment is as follows:

Faraday's law:

$$C=(nF)/M$$

where, C represents theoretical specific capacity ( $C = 147 \text{ mAh g}^{-1}$ ). N is the number of  $\text{Li}^+$  per molecule, representing the number of lithium ions that can be deintercalated per molecule in the positive electrode material. M is the molecular weight of the material, and the actual molecular weight of the active material of the positive electrode material is required for calculation. F is Faraday's constant, approximately  $96485 \text{ C/mol}$ .

The relative molecular weight values are as follows:

$$\text{Li: } 6.94; \quad \text{Ni: } 58.69; \quad \text{Mn: } 54.94; \quad \text{O: } 16.00; \quad \text{Ti: } 47.87$$

$$M_{\text{LNMO}}=6.94+58.69\times 0.5+54.94\times 1.5+16.00\times 4=182.695$$

$$\text{At this moment, } C = 147 \text{ mAh g}^{-1}$$

Taking LNMO-TiF<sub>3</sub>-2 as an example:

When Ti completely replaces the position of Ni 16d, the molecular formula is

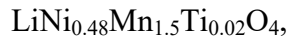

$$M_1=6.94+58.69\times 0.48+54.94\times 1.5+47.87\times 0.02+16.00\times 4=182.4786.$$

$$\text{Therefore, } C_1=147.17 \text{ mAh g}^{-1}, \quad \Delta C_1=0.17 \text{ mAh g}^{-1}.$$

When Ti completely replaces the position of Mn 16d, the molecular formula is

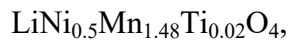

$$M_2=6.94+58.69\times 0.5+54.94\times 1.48+47.87\times 0.02+16.00\times 4=182.5536.$$

$$\text{Therefore, } C_2=147.11 \text{ mAh g}^{-1}, \quad \Delta C_2=0.11 \text{ mAh g}^{-1}.$$

Due to the disorderly distribution of Mn and Ni, the theoretical increased capacity should be somewhere in between.  $0.11 \text{ mAh g}^{-1} < \Delta C < 0.17 \text{ mAh g}^{-1}$

Similarly, in LNMO-TiF<sub>3</sub>-4,  $0.22 \text{ mAh g}^{-1} < \Delta C < 0.35 \text{ mAh g}^{-1}$ ;

In LNMO-TiF<sub>3</sub>-6,  $0.34 \text{ mAh g}^{-1} < \Delta C < 0.52 \text{ mAh g}^{-1}$ .

Note: During the calculation, it was assumed that all doped Ti were doped and had electrochemical activity, but the true direct capacity contribution from Ti oxidation and reduction was less than the theoretical estimate.
